# Supplementary material
Source: publisher figshare collection journal article supplement (https://acs.figshare.com/ndownloader/files/3786337)
Supplement: Supplementary file 1 [file 3786337]

#  
data_global 
#===============================================================================
_audit_creation_method      'manual editing of form.cif'

# SUBMISSION DETAILS
_publ_contact_author_name      'Prof. Jaeheung Cho'
_publ_contact_author_address
; Department of Emerging Materials Science
  DGIST
  Daegu 711-873
  Korea
;
_publ_contact_author_email      jaeheung@dgist.ac.kr
loop_
_publ_author_name
'Kim, Jalee'
'Cho, Jaeheung'

_publ_requested_journal      'Inorg.Chem.'
################################################################################ 


data_global
_audit_creation_method                  'APEX2 v2012.10-0'

_publ_requested_journal                 ?

_publ_contact_author_name               ?
_publ_contact_author_address            
;
;
_publ_contact_author_email              ?
_publ_contact_author_fax                ?
_publ_contact_author_phone              ?

_publ_section_title                     
;
;
_publ_section_abstract                  
;
;
_publ_section_references                
;
;
_publ_section_comment                   
;
;

data_I
_chemical_name_systematic               ?
_chemical_name_common                   'Dr Cho [Ni(II)(CHDAP)](NO3)2'
_chemical_formula_moiety                ?
_chemical_formula_sum                   'C27 H40 N6 Ni O7'
_chemical_formula_iupac                 ?
_chemical_formula_weight                619.36

_chemical_melting_point                 ?

_space_group_crystal_system             triclinic
_space_group_name_H-M_alt               'P -1'
_space_group_name_Hall                  '-P 1'
loop_
    _space_group_symop_operation_xyz
    'x, y, z'
    '-x, -y, -z'

_cell_length_a                          10.6798(2)
_cell_length_b                          11.8168(2)
_cell_length_c                          12.9559(2)
_cell_angle_alpha                       64.1040(10)
_cell_angle_beta                        82.1330(10)
_cell_angle_gamma                       78.9810(10)
_cell_volume                            1441.11(4)
_cell_formula_units_Z                   2
_cell_measurement_reflns_used           9872
_cell_measurement_theta_min             2.5357
_cell_measurement_theta_max             28.3279
_cell_measurement_temperature           100.(2)

_exptl_crystal_description              block
_exptl_crystal_colour                   'dark purple'
_exptl_crystal_size_max                 0.350
_exptl_crystal_size_mid                 0.320
_exptl_crystal_size_min                 0.280
_exptl_crystal_density_diffrn           1.427
_exptl_crystal_density_meas             ?
_exptl_crystal_density_method           'not measured'
_exptl_crystal_F_000                    656

_exptl_absorpt_coefficient_mu           0.729
_exptl_absorpt_correction_type          multi-scan
_exptl_absorpt_process_details          'SADABS V2012/1 (Bruker AXS Inc.)'
_exptl_absorpt_correction_T_min         0.76
_exptl_absorpt_correction_T_max         0.82

_exptl_special_details                  
;
; 

_diffrn_ambient_temperature             100.(2)

_diffrn_source                          ?
_diffrn_source_type                     ?

_diffrn_radiation_type                  ?
_diffrn_radiation_wavelength            0.71073
_diffrn_radiation_monochromator         ?

_diffrn_measurement_device_type         ?
_diffrn_measurement_method              ?

_diffrn_detector_area_resol_mean        8.3333

_diffrn_reflns_number                   24970
_diffrn_reflns_av_R_equivalents         0.0187
_diffrn_reflns_av_sigmaI/netI           0.0136
_diffrn_reflns_theta_min                1.75
_diffrn_reflns_theta_max                28.33
_diffrn_reflns_theta_full               28.33
_diffrn_measured_fraction_theta_max     0.975
_diffrn_measured_fraction_theta_full    0.975
_diffrn_reflns_limit_h_min              -14
_diffrn_reflns_limit_h_max              14
_diffrn_reflns_limit_k_min              -15
_diffrn_reflns_limit_k_max              15
_diffrn_reflns_limit_l_min              -17
_diffrn_reflns_limit_l_max              14

_refine_special_details                 
;
Refinement of F^2^ against ALL reflections.  The weighted R-factor wR and
goodness of fit S are based on F^2^, conventional R-factors R are based
on F, with F set to zero for negative F^2^. The threshold expression of
F^2^ > 2sigma(F^2^) is used only for calculating R-factors(gt) etc. and is
not relevant to the choice of reflections for refinement.  R-factors based
on F^2^ are statistically about twice as large as those based on F, and R-
factors based on ALL data will be even larger.
;

_reflns_number_total                    7001
_reflns_number_gt                       6713
_reflns_threshold_expression            >2sigma(I)

_refine_ls_structure_factor_coef        Fsqd
_refine_ls_matrix_type                  full
_refine_ls_R_factor_all                 0.0274
_refine_ls_R_factor_gt                  0.0261
_refine_ls_wR_factor_gt                 0.0702
_refine_ls_wR_factor_ref                0.0713
_refine_ls_goodness_of_fit_ref          1.037
_refine_ls_restrained_S_all             1.037
_refine_ls_number_reflns                7001
_refine_ls_number_parameters            372
_refine_ls_number_restraints            0
_refine_ls_hydrogen_treatment           constr
_refine_ls_weighting_scheme             calc
_refine_ls_weighting_details            
    'calc w=1/[\s^2^(Fo^2^)+(0.0395P)^2^+0.6077P] where P=(Fo^2^+2Fc^2^)/3'

_atom_sites_solution_hydrogens          geom
_atom_sites_solution_primary            direct
_atom_sites_solution_secondary          difmap

_refine_ls_shift/su_max                 0.001
_refine_ls_shift/su_mean                0.000
_refine_diff_density_max                0.521
_refine_diff_density_min                -0.242
_refine_ls_extinction_method            none
_refine_ls_extinction_coef              ?

loop_
    _atom_type_symbol
    _atom_type_description
    _atom_type_scat_dispersion_real
    _atom_type_scat_dispersion_imag
    _atom_type_scat_source
    C C 0.0033 0.0016 'International Tables Vol C Tables 4.2.6.8 and 6.1.1.4'
    H H 0.0000 0.0000 'International Tables Vol C Tables 4.2.6.8 and 6.1.1.4'
    N N 0.0061 0.0033 'International Tables Vol C Tables 4.2.6.8 and 6.1.1.4'
    O O 0.0106 0.0060 'International Tables Vol C Tables 4.2.6.8 and 6.1.1.4'
    Ni Ni 0.3393 1.1124
     'International Tables Vol C Tables 4.2.6.8 and 6.1.1.4'

_computing_data_collection              ?
_computing_cell_refinement              'SAINT V8.27B (Bruker AXS Inc., 2012)'
_computing_data_reduction               'SAINT V8.27B (Bruker AXS Inc., 2012)'
_computing_structure_solution           'SHELXS-97 (Sheldrick, 2008)'
_computing_structure_refinement         'SHELXL-97 (Sheldrick, 2008)'
_computing_molecular_graphics           ?
_computing_publication_material         ?

loop_
    _atom_site_type_symbol
    _atom_site_label
    _atom_site_fract_x
    _atom_site_fract_y
    _atom_site_fract_z
    _atom_site_U_iso_or_equiv
    _atom_site_adp_type
    _atom_site_calc_flag
    _atom_site_refinement_flags
    _atom_site_occupancy
    _atom_site_disorder_assembly
    _atom_site_disorder_group
    Ni Ni1 0.255023(12) 0.246931(12) 0.397831(11) 0.01370(5) Uani d . 1 . .
    N N3 0.19963(9) 0.41864(9) 0.38540(8) 0.01606(17) Uani d . 1 . .
    N N2 0.14988(9) 0.32751(9) 0.24167(8) 0.01602(18) Uani d . 1 . .
    N N1 0.40090(9) 0.28856(9) 0.28652(8) 0.01608(18) Uani d . 1 . .
    N N4 0.39703(9) 0.24845(9) 0.50569(8) 0.01605(18) Uani d . 1 . .
    N N6 0.32543(10) 0.45194(11) 0.77335(10) 0.0260(2) Uani d . 1 . .
    N N5 0.16811(10) 0.04270(10) 0.51858(9) 0.0218(2) Uani d . 1 . .
    O O2 0.27644(8) 0.04852(8) 0.46099(8) 0.02296(17) Uani d . 1 . .
    O O1 0.10555(8) 0.14989(8) 0.50866(7) 0.02125(17) Uani d . 1 . .
    O O6 0.43749(9) 0.43899(10) 0.73136(9) 0.0336(2) Uani d . 1 . .
    O O3 0.12934(11) -0.05786(9) 0.57847(10) 0.0375(2) Uani d . 1 . .
    O O4 0.30372(14) 0.41246(14) 0.87773(10) 0.0540(4) Uani d . 1 . .
    O O5 0.24104(14) 0.5045(2) 0.70616(16) 0.0821(6) Uani d . 1 . .
    O O7 0.34860(10) 0.62418(9) 0.14826(9) 0.0295(2) Uani d . 1 . .
    H H7 0.4159 0.592 0.1838 0.044 Uiso calc R 1 . .
    C C12 0.26115(11) 0.46401(10) 0.43902(10) 0.0178(2) Uani d . 1 . .
    C C25 0.38053(10) 0.34000(10) 0.17450(10) 0.0169(2) Uani d . 1 . .
    C C10 0.25590(11) 0.20152(11) 0.68435(10) 0.0201(2) Uani d . 1 . .
    H H10A 0.1846 0.2111 0.6384 0.024 Uiso calc R 1 . .
    H H10B 0.2581 0.2852 0.6838 0.024 Uiso calc R 1 . .
    C C5 0.38188(10) 0.15943(10) 0.63053(9) 0.0176(2) Uani d . 1 . .
    H H5 0.3762 0.0744 0.634 0.021 Uiso calc R 1 . .
    C C4 0.52089(10) 0.20737(11) 0.45385(10) 0.0198(2) Uani d . 1 . .
    H H4A 0.5384 0.1133 0.4876 0.024 Uiso calc R 1 . .
    H H4B 0.5909 0.2382 0.4725 0.024 Uiso calc R 1 . .
    C C16 0.09849(11) 0.48657(11) 0.32351(10) 0.0187(2) Uani d . 1 . .
    C C26 0.48295(11) 0.35292(11) 0.09378(10) 0.0211(2) Uani d . 1 . .
    H H26 0.4696 0.3839 0.0144 0.025 Uiso calc R 1 . .
    C C13 0.21394(13) 0.58160(12) 0.44037(11) 0.0245(2) Uani d . 1 . .
    H H13 0.2546 0.6135 0.4808 0.029 Uiso calc R 1 . .
    C C18 0.09199(11) 0.23549(11) 0.21852(10) 0.0198(2) Uani d . 1 . .
    H H18 0.0396 0.1882 0.2895 0.024 Uiso calc R 1 . .
    C C24 0.24275(10) 0.39368(11) 0.14609(10) 0.0182(2) Uani d . 1 . .
    H H24A 0.2283 0.4852 0.1291 0.022 Uiso calc R 1 . .
    H H24B 0.2266 0.386 0.0761 0.022 Uiso calc R 1 . .
    C C11 0.38682(11) 0.38479(10) 0.48651(10) 0.0180(2) Uani d . 1 . .
    H H11A 0.4579 0.4229 0.4323 0.022 Uiso calc R 1 . .
    H H11B 0.3963 0.3874 0.5604 0.022 Uiso calc R 1 . .
    C C3 0.51819(10) 0.25833(10) 0.32490(10) 0.0177(2) Uani d . 1 . .
    C C17 0.04770(11) 0.42167(11) 0.26343(10) 0.0201(2) Uani d . 1 . .
    H H17A -0.0238 0.3776 0.3115 0.024 Uiso calc R 1 . .
    H H17B 0.0143 0.4864 0.1894 0.024 Uiso calc R 1 . .
    C C2 0.62513(11) 0.27372(11) 0.24850(11) 0.0221(2) Uani d . 1 . .
    H H2 0.7088 0.2538 0.2748 0.027 Uiso calc R 1 . .
    C C7 0.46974(13) 0.04357(12) 0.82653(11) 0.0258(2) Uani d . 1 . .
    H H7A 0.4677 -0.0402 0.8273 0.031 Uiso calc R 1 . .
    H H7B 0.5408 0.0341 0.8727 0.031 Uiso calc R 1 . .
    C C15 0.04861(12) 0.60571(12) 0.31922(11) 0.0252(2) Uani d . 1 . .
    H H15 -0.0227 0.655 0.2752 0.03 Uiso calc R 1 . .
    C C6 0.49369(11) 0.14061(12) 0.70235(10) 0.0220(2) Uani d . 1 . .
    H H6A 0.5742 0.11 0.6684 0.026 Uiso calc R 1 . .
    H H6B 0.5025 0.2228 0.7017 0.026 Uiso calc R 1 . .
    C C23 0.19655(12) 0.13754(12) 0.19861(12) 0.0239(2) Uani d . 1 . .
    H H23A 0.2531 0.0971 0.2636 0.029 Uiso calc R 1 . .
    H H23B 0.249 0.1803 0.1274 0.029 Uiso calc R 1 . .
    C C19 0.00232(12) 0.29858(15) 0.11867(12) 0.0304(3) Uani d . 1 . .
    H H19A -0.0672 0.3586 0.1344 0.036 Uiso calc R 1 . .
    H H19B 0.0507 0.3473 0.0467 0.036 Uiso calc R 1 . .
    C C8 0.34369(13) 0.08516(12) 0.88050(11) 0.0268(3) Uani d . 1 . .
    H H8A 0.3477 0.1657 0.8853 0.032 Uiso calc R 1 . .
    H H8B 0.3291 0.0197 0.9594 0.032 Uiso calc R 1 . .
    C C1 0.60594(11) 0.31912(12) 0.13243(11) 0.0240(2) Uani d . 1 . .
    H H1 0.6776 0.3272 0.0787 0.029 Uiso calc R 1 . .
    C C9 0.23327(12) 0.10399(12) 0.80802(10) 0.0248(2) Uani d . 1 . .
    H H9A 0.2254 0.0218 0.8081 0.03 Uiso calc R 1 . .
    H H9B 0.1523 0.1336 0.8421 0.03 Uiso calc R 1 . .
    C C14 0.10545(13) 0.65127(12) 0.38085(12) 0.0284(3) Uani d . 1 . .
    H H14 0.07 0.7307 0.3824 0.034 Uiso calc R 1 . .
    C C22 0.13584(15) 0.03594(16) 0.18812(16) 0.0397(4) Uani d . 1 . .
    H H22A 0.2038 -0.0274 0.1755 0.048 Uiso calc R 1 . .
    H H22B 0.086 -0.0088 0.2605 0.048 Uiso calc R 1 . .
    C C20 -0.05488(14) 0.1977(2) 0.10400(16) 0.0437(4) Uani d . 1 . .
    H H20A -0.107 0.2391 0.036 0.052 Uiso calc R 1 . .
    H H20B -0.1119 0.1566 0.1723 0.052 Uiso calc R 1 . .
    C C21 0.04881(15) 0.0959(2) 0.08891(18) 0.0505(5) Uani d . 1 . .
    H H21A 0.0082 0.0294 0.0849 0.061 Uiso calc R 1 . .
    H H21B 0.0999 0.135 0.0158 0.061 Uiso calc R 1 . .
    C C27 0.32834(16) 0.75644(14) 0.11378(15) 0.0373(3) Uani d . 1 . .
    H H27A 0.3282 0.7743 0.1809 0.056 Uiso calc R 1 . .
    H H27B 0.2459 0.7929 0.0788 0.056 Uiso calc R 1 . .
    H H27C 0.3968 0.7943 0.0576 0.056 Uiso calc R 1 . .

loop_
    _atom_site_aniso_label
    _atom_site_aniso_U_11
    _atom_site_aniso_U_22
    _atom_site_aniso_U_33
    _atom_site_aniso_U_12
    _atom_site_aniso_U_13
    _atom_site_aniso_U_23
    Ni1 0.01263(7) 0.01383(7) 0.01476(8) -0.00017(5) -0.00003(5) -0.00707(5)
    N3 0.0173(4) 0.0157(4) 0.0151(4) 0.0000(3) -0.0004(3) -0.0075(3)
    N2 0.0143(4) 0.0182(4) 0.0174(4) -0.0014(3) 0.0005(3) -0.0099(4)
    N1 0.0156(4) 0.0169(4) 0.0173(4) -0.0020(3) 0.0007(3) -0.0093(4)
    N4 0.0151(4) 0.0167(4) 0.0161(4) 0.0001(3) -0.0011(3) -0.0076(3)
    N6 0.0230(5) 0.0358(6) 0.0266(5) -0.0044(4) -0.0006(4) -0.0200(5)
    N5 0.0242(5) 0.0190(4) 0.0204(5) -0.0055(4) -0.0044(4) -0.0048(4)
    O2 0.0210(4) 0.0181(4) 0.0290(5) 0.0004(3) -0.0024(3) -0.0103(3)
    O1 0.0197(4) 0.0227(4) 0.0214(4) -0.0033(3) 0.0015(3) -0.0102(3)
    O6 0.0271(5) 0.0362(5) 0.0390(6) -0.0053(4) 0.0071(4) -0.0197(5)
    O3 0.0419(6) 0.0233(5) 0.0379(6) -0.0156(4) -0.0057(4) 0.0009(4)
    O4 0.0758(9) 0.0702(9) 0.0292(6) -0.0407(7) 0.0227(6) -0.0284(6)
    O5 0.0464(8) 0.1383(16) 0.0802(11) 0.0430(9) -0.0402(8) -0.0755(12)
    O7 0.0328(5) 0.0256(4) 0.0347(5) -0.0086(4) 0.0020(4) -0.0164(4)
    C12 0.0208(5) 0.0168(5) 0.0157(5) -0.0025(4) 0.0008(4) -0.0074(4)
    C25 0.0184(5) 0.0154(5) 0.0183(5) -0.0031(4) 0.0006(4) -0.0087(4)
    C10 0.0195(5) 0.0238(5) 0.0157(5) -0.0008(4) -0.0018(4) -0.0080(4)
    C5 0.0182(5) 0.0177(5) 0.0160(5) -0.0006(4) -0.0034(4) -0.0065(4)
    C4 0.0140(5) 0.0250(5) 0.0213(5) 0.0016(4) -0.0019(4) -0.0121(5)
    C16 0.0182(5) 0.0192(5) 0.0172(5) 0.0010(4) 0.0000(4) -0.0082(4)
    C26 0.0232(5) 0.0210(5) 0.0189(5) -0.0043(4) 0.0042(4) -0.0094(4)
    C13 0.0305(6) 0.0209(5) 0.0262(6) -0.0020(5) -0.0010(5) -0.0147(5)
    C18 0.0171(5) 0.0273(6) 0.0217(5) -0.0069(4) 0.0026(4) -0.0160(5)
    C24 0.0182(5) 0.0197(5) 0.0158(5) -0.0031(4) 0.0000(4) -0.0069(4)
    C11 0.0192(5) 0.0181(5) 0.0182(5) -0.0032(4) -0.0017(4) -0.0088(4)
    C3 0.0162(5) 0.0175(5) 0.0211(5) -0.0010(4) -0.0002(4) -0.0106(4)
    C17 0.0167(5) 0.0234(5) 0.0209(5) 0.0037(4) -0.0034(4) -0.0121(4)
    C2 0.0154(5) 0.0241(6) 0.0278(6) -0.0017(4) 0.0018(4) -0.0133(5)
    C7 0.0298(6) 0.0234(6) 0.0212(6) -0.0002(5) -0.0104(5) -0.0057(5)
    C15 0.0252(6) 0.0213(5) 0.0267(6) 0.0069(4) -0.0038(5) -0.0114(5)
    C6 0.0204(5) 0.0240(5) 0.0207(5) -0.0006(4) -0.0071(4) -0.0079(5)
    C23 0.0215(5) 0.0282(6) 0.0309(6) -0.0062(5) 0.0035(5) -0.0211(5)
    C19 0.0192(6) 0.0518(8) 0.0300(7) -0.0054(5) -0.0025(5) -0.0260(6)
    C8 0.0355(7) 0.0253(6) 0.0165(5) -0.0031(5) -0.0062(5) -0.0053(5)
    C1 0.0199(5) 0.0261(6) 0.0260(6) -0.0043(4) 0.0076(4) -0.0131(5)
    C9 0.0274(6) 0.0274(6) 0.0177(5) -0.0060(5) 0.0000(4) -0.0073(5)
    C14 0.0342(7) 0.0192(5) 0.0329(7) 0.0046(5) -0.0019(5) -0.0155(5)
    C22 0.0333(7) 0.0467(8) 0.0626(10) -0.0173(6) 0.0162(7) -0.0454(8)
    C20 0.0217(6) 0.0835(13) 0.0560(10) -0.0145(7) 0.0044(6) -0.0562(10)
    C21 0.0277(7) 0.0917(14) 0.0742(12) -0.0217(8) 0.0137(7) -0.0731(12)
    C27 0.0456(8) 0.0272(7) 0.0454(9) -0.0021(6) -0.0151(7) -0.0188(6)

_geom_special_details                   
;
All esds (except the esd in the dihedral angle between two l.s. planes)
are estimated using the full covariance matrix.  The cell esds are taken
into account individually in the estimation of esds in distances, angles
and torsion angles; correlations between esds in cell parameters are only
used when they are defined by crystal symmetry.  An approximate (isotropic)
treatment of cell esds is used for estimating esds involving l.s. planes.
;

loop_
    _geom_bond_atom_site_label_1
    _geom_bond_atom_site_label_2
    _geom_bond_site_symmetry_2
    _geom_bond_distance
    _geom_bond_publ_flag
    Ni1 N3 . 1.9429(9) ?
    Ni1 N1 . 1.9512(9) ?
    Ni1 O2 . 2.0951(8) ?
    Ni1 O1 . 2.1352(8) ?
    Ni1 N2 . 2.1889(9) ?
    Ni1 N4 . 2.2058(9) ?
    N3 C12 . 1.3366(15) ?
    N3 C16 . 1.3407(14) ?
    N2 C17 . 1.4947(14) ?
    N2 C24 . 1.4977(14) ?
    N2 C18 . 1.4992(14) ?
    N1 C25 . 1.3373(14) ?
    N1 C3 . 1.3373(14) ?
    N4 C4 . 1.4942(14) ?
    N4 C5 . 1.5021(14) ?
    N4 C11 . 1.5032(14) ?
    N6 O5 . 1.2182(17) ?
    N6 O4 . 1.2266(16) ?
    N6 O6 . 1.2555(14) ?
    N5 O3 . 1.2166(14) ?
    N5 O1 . 1.2748(13) ?
    N5 O2 . 1.2843(14) ?
    O7 C27 . 1.4059(16) ?
    C12 C13 . 1.3915(15) ?
    C12 C11 . 1.5163(15) ?
    C25 C26 . 1.3873(15) ?
    C25 C24 . 1.5134(15) ?
    C10 C5 . 1.5277(15) ?
    C10 C9 . 1.5302(16) ?
    C5 C6 . 1.5371(15) ?
    C4 C3 . 1.5107(16) ?
    C16 C15 . 1.3864(16) ?
    C16 C17 . 1.5114(16) ?
    C26 C1 . 1.3930(17) ?
    C13 C14 . 1.3930(19) ?
    C18 C23 . 1.5301(16) ?
    C18 C19 . 1.5395(17) ?
    C3 C2 . 1.3892(15) ?
    C2 C1 . 1.3889(18) ?
    C7 C8 . 1.5272(19) ?
    C7 C6 . 1.5352(17) ?
    C15 C14 . 1.3889(19) ?
    C23 C22 . 1.5311(17) ?
    C19 C20 . 1.530(2) ?
    C8 C9 . 1.5304(18) ?
    C22 C21 . 1.516(3) ?
    C20 C21 . 1.532(2) ?

loop_
    _geom_angle_atom_site_label_1
    _geom_angle_atom_site_label_2
    _geom_angle_atom_site_label_3
    _geom_angle_site_symmetry_1
    _geom_angle_site_symmetry_3
    _geom_angle
    _geom_angle_publ_flag
    N3 Ni1 N1 . . 95.64(4) ?
    N3 Ni1 O2 . . 161.14(4) ?
    N1 Ni1 O2 . . 102.31(4) ?
    N3 Ni1 O1 . . 101.56(4) ?
    N1 Ni1 O1 . . 161.96(4) ?
    O2 Ni1 O1 . . 61.28(3) ?
    N3 Ni1 N2 . . 80.42(4) ?
    N1 Ni1 N2 . . 82.32(4) ?
    O2 Ni1 N2 . . 107.48(4) ?
    O1 Ni1 N2 . . 95.12(3) ?
    N3 Ni1 N4 . . 82.08(4) ?
    N1 Ni1 N4 . . 79.40(4) ?
    O2 Ni1 N4 . . 95.48(3) ?
    O1 Ni1 N4 . . 108.17(3) ?
    N2 Ni1 N4 . . 153.22(4) ?
    C12 N3 C16 . . 122.59(10) ?
    C12 N3 Ni1 . . 119.75(8) ?
    C16 N3 Ni1 . . 117.66(8) ?
    C17 N2 C24 . . 110.83(9) ?
    C17 N2 C18 . . 110.45(8) ?
    C24 N2 C18 . . 111.99(9) ?
    C17 N2 Ni1 . . 101.82(6) ?
    C24 N2 Ni1 . . 105.19(6) ?
    C18 N2 Ni1 . . 116.03(7) ?
    C25 N1 C3 . . 122.32(10) ?
    C25 N1 Ni1 . . 118.68(7) ?
    C3 N1 Ni1 . . 118.89(8) ?
    C4 N4 C5 . . 109.99(8) ?
    C4 N4 C11 . . 110.78(9) ?
    C5 N4 C11 . . 112.75(8) ?
    C4 N4 Ni1 . . 102.88(6) ?
    C5 N4 Ni1 . . 114.35(7) ?
    C11 N4 Ni1 . . 105.60(6) ?
    O5 N6 O4 . . 122.38(15) ?
    O5 N6 O6 . . 117.09(14) ?
    O4 N6 O6 . . 120.53(13) ?
    O3 N5 O1 . . 122.99(11) ?
    O3 N5 O2 . . 122.18(11) ?
    O1 N5 O2 . . 114.83(9) ?
    N5 O2 Ni1 . . 92.72(6) ?
    N5 O1 Ni1 . . 91.16(6) ?
    N3 C12 C13 . . 119.94(11) ?
    N3 C12 C11 . . 115.43(9) ?
    C13 C12 C11 . . 124.43(10) ?
    N1 C25 C26 . . 120.18(10) ?
    N1 C25 C24 . . 114.71(9) ?
    C26 C25 C24 . . 124.75(10) ?
    C5 C10 C9 . . 110.58(10) ?
    N4 C5 C10 . . 110.27(9) ?
    N4 C5 C6 . . 114.89(9) ?
    C10 C5 C6 . . 110.46(9) ?
    N4 C4 C3 . . 111.41(9) ?
    N3 C16 C15 . . 120.09(11) ?
    N3 C16 C17 . . 114.48(10) ?
    C15 C16 C17 . . 125.42(11) ?
    C25 C26 C1 . . 118.08(11) ?
    C14 C13 C12 . . 118.21(12) ?
    N2 C18 C23 . . 110.42(9) ?
    N2 C18 C19 . . 114.19(10) ?
    C23 C18 C19 . . 110.41(10) ?
    N2 C24 C25 . . 112.75(9) ?
    N4 C11 C12 . . 113.12(9) ?
    N1 C3 C2 . . 120.43(11) ?
    N1 C3 C4 . . 114.35(9) ?
    C2 C3 C4 . . 125.22(10) ?
    N2 C17 C16 . . 111.11(9) ?
    C1 C2 C3 . . 117.92(11) ?
    C8 C7 C6 . . 111.28(10) ?
    C14 C15 C16 . . 118.33(11) ?
    C7 C6 C5 . . 109.92(10) ?
    C18 C23 C22 . . 109.81(10) ?
    C20 C19 C18 . . 110.32(13) ?
    C7 C8 C9 . . 109.98(10) ?
    C2 C1 C26 . . 120.81(11) ?
    C10 C9 C8 . . 110.65(10) ?
    C15 C14 C13 . . 120.59(11) ?
    C21 C22 C23 . . 110.55(14) ?
    C19 C20 C21 . . 111.83(11) ?
    C22 C21 C20 . . 110.74(12) ?
